# Supplementary material for: Vertical Transmission of SARS-CoV-2 in Second Trimester Associated with Severe Neonatal Pathology
Source: PubMed Central journal article supplement (PMC7999228; doi:10.3390/v13030447), 2021-03-10
Supplement: viruses-13-00447-s001.pdf [file viruses-13-00447-s001.pdf]

Supplementary materials

**Table 1.** Peptides from the P0DTC9|NCAP-SARS2 Nucleoprotein identified in the placenta sample from COVID-19 patient.

| Peptide                      | -10lgP | Mass      | Length | ppm | m/z      | z |
|------------------------------|--------|-----------|--------|-----|----------|---|
| K.DGIIWVATEGALNTPK.D         | 93.59  | 1683.8832 | 16     | 2.3 | 842.9508 | 2 |
| R.NPANNAAIVLQLPQGTTLPK<br>.G | 67.35  | 2059.1426 | 20     | 1.4 | 1030.58  | 2 |

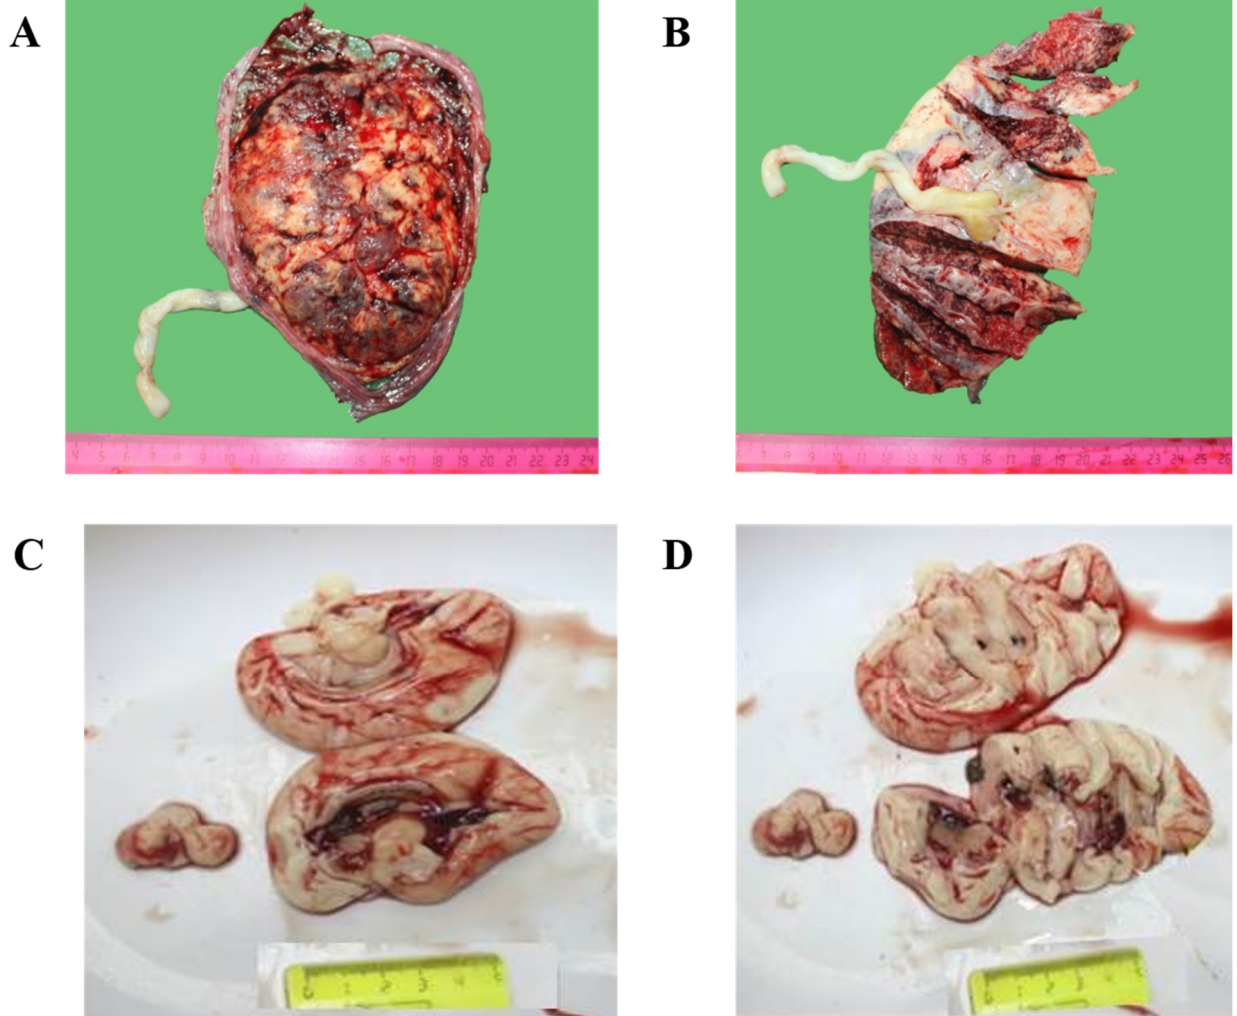

**Figure S1.** Extensive infarctions of the placenta (A - maternal surface, B - fetal surface, sectional view) and hemorrhages in the brain (C, D).

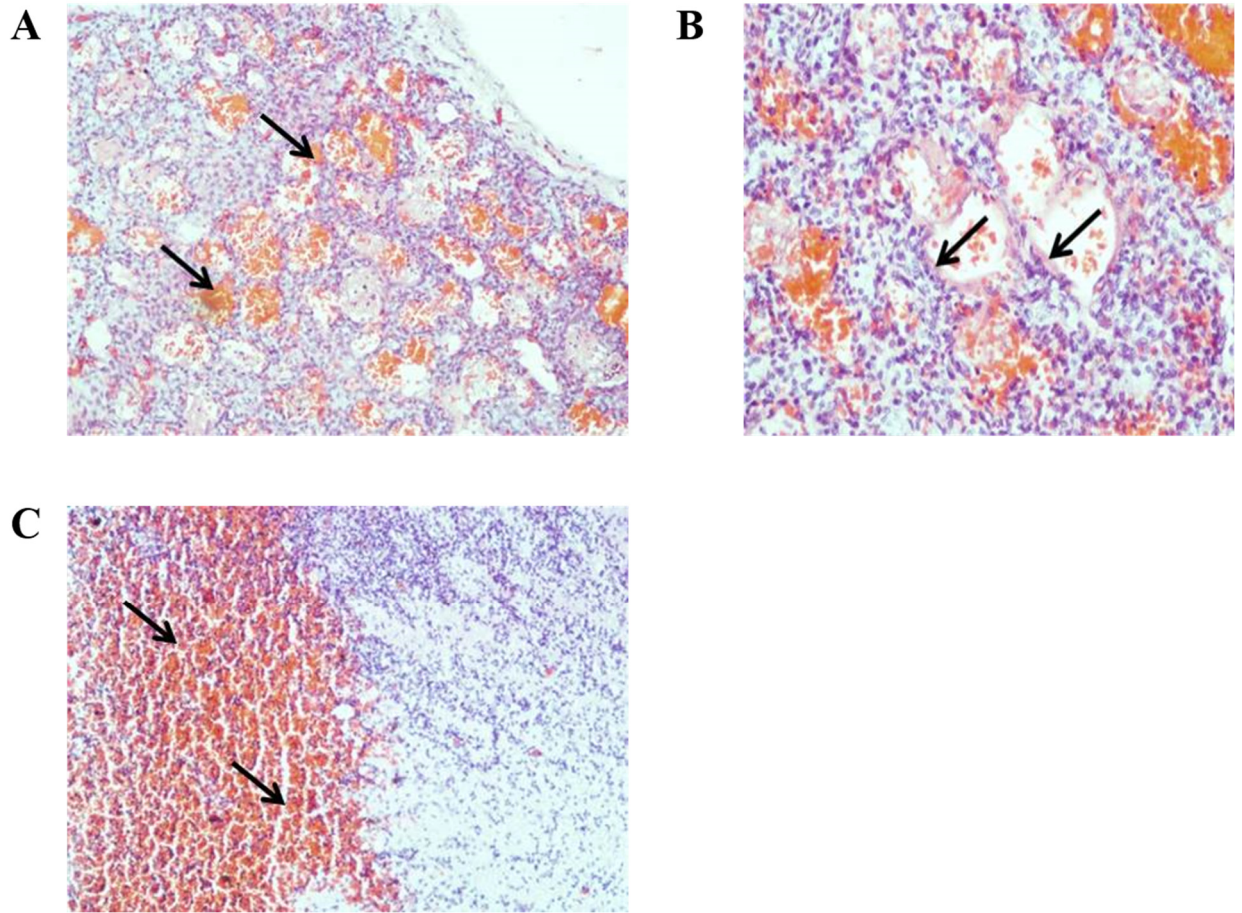

**Figure S2.** Microscopic changes in the lungs (A, B) and the brain (C): A - hemorrhages in the lumen of the alveoli, g-e x100; B - hyaline membranes in the alveoli, dx 200; C - hemorrhages in the periventricular region, g-e x100.

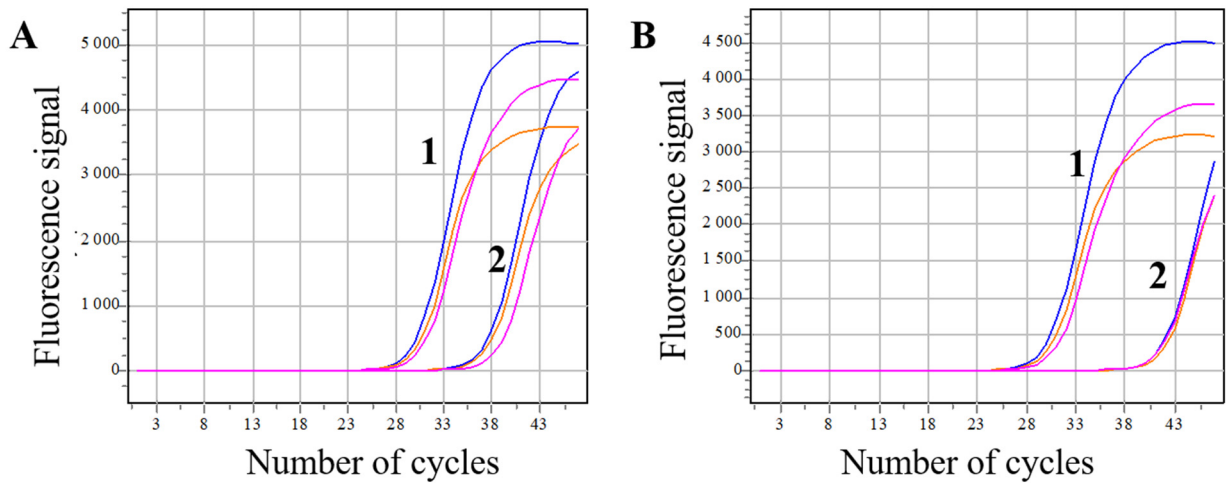

**Figure S3.** Fluorescence cycles in RT-PCR for three SARS-CoV-2 genes (blue, orange and purple color, respectively): 1 - the positive control, 2 – the placental (A) and umbilical cord blood (B) samples. The earlier the signal is detected, the higher the viral load is.

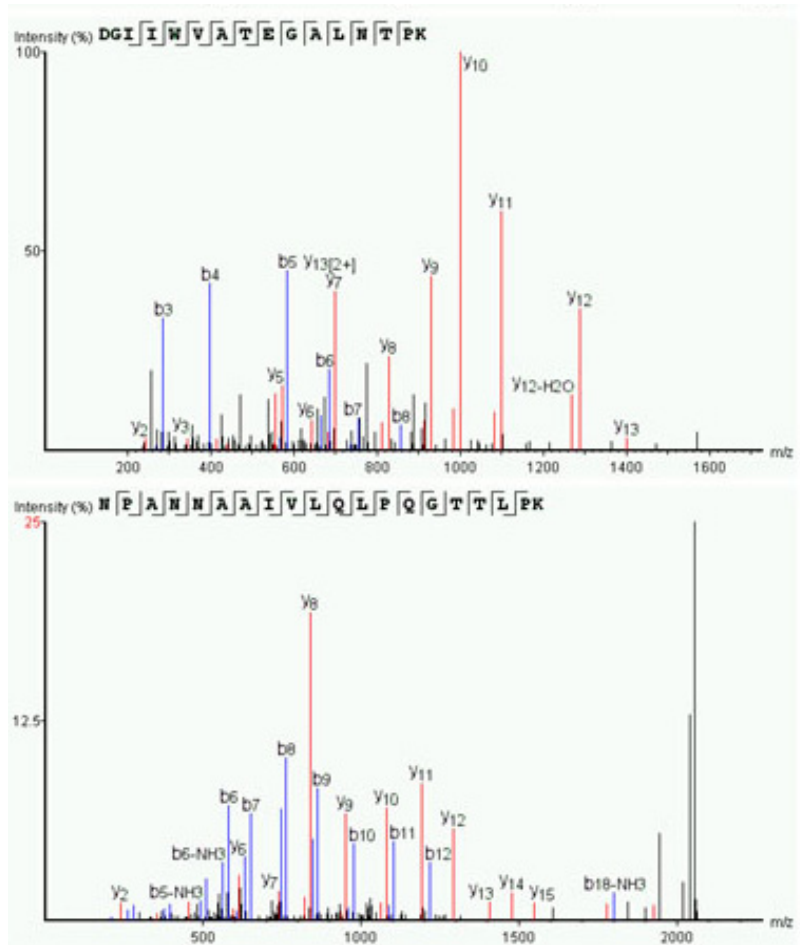

**Figure S4.** MS/MS data of detected peptides of P0DTC9|NCAP\_SARS2 Nucleoprotein.
